# Supplementary material for: A highly twisted triarylborane-based biphenyl as an efficient host for blue and green phosphorescent OLEDs
Source: Royal Society of Chemistry journal article supplement (doi:10.1039/c6tc02451c), 2016-01-01
Supplement: c6tc02451c1.pdf [file c6tc02451c1.pdf]

## Supporting Information

### Highly Twisted Triarylborane-based Biphenyl as Efficient Hosts for Blue and Green Phosphorescent OLEDs

Chen Wang,<sup>a</sup> Yi Yuan,<sup>b</sup> Sheng-Yong Li,<sup>a</sup> Zuo-Bang Sun,<sup>a</sup> Zuo-Quan Jiang,<sup>\*b</sup> and  
Cui-Hua Zhao<sup>\*a</sup>

<sup>a</sup> School of Chemistry and Chemical Engineering, Key Laboratory of Special Functional Aggregated Materials, Ministry of Education, Shandong University, Jinan 250100, P.R. China. E-mail: chzhao@sdu.edu.cn

<sup>b</sup> Jiangsu Key Laboratory for Carbon-Based Functional Materials & Devices, Institute of Functional Nano & Soft Materials (FUNSOM), Soochow University, Suzhou 215123, P.R. China. E-mail: zqjiang@suda.edu.cn

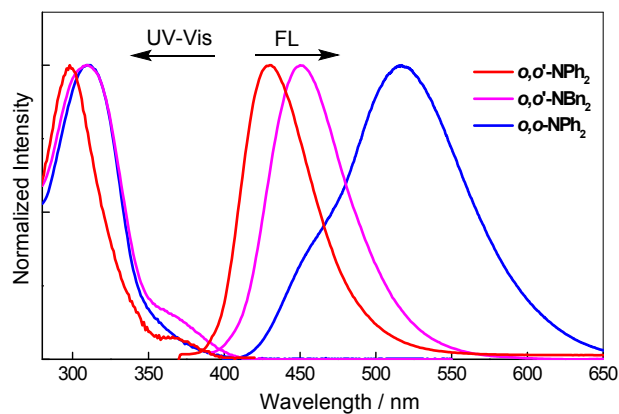

**Figure S1.** UV-Vis absorption and fluorescence spectra of *o,o'*-substituted biphenyls in cyclohexane.

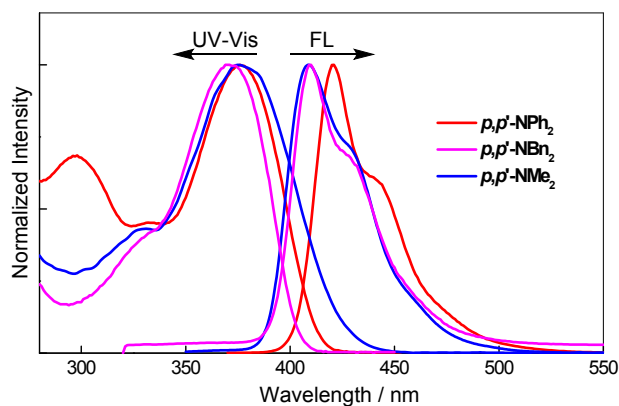

**Figure S2.** UV-Vis absorption and fluorescence spectra of *p,p'*-substituted biphenyls in cyclohexane.

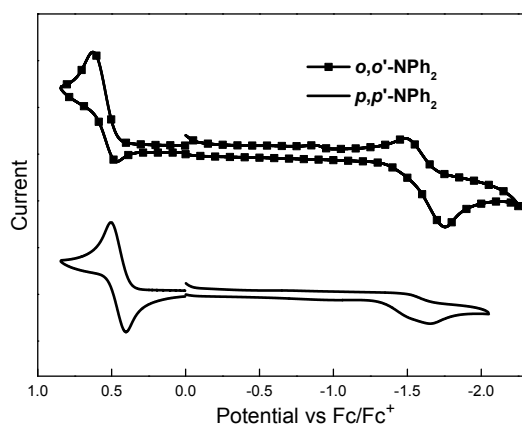

**Figure S3.** Cyclic voltammograms of *o,o'*-NPh<sub>2</sub> and *p,p'*-NPh<sub>2</sub>.

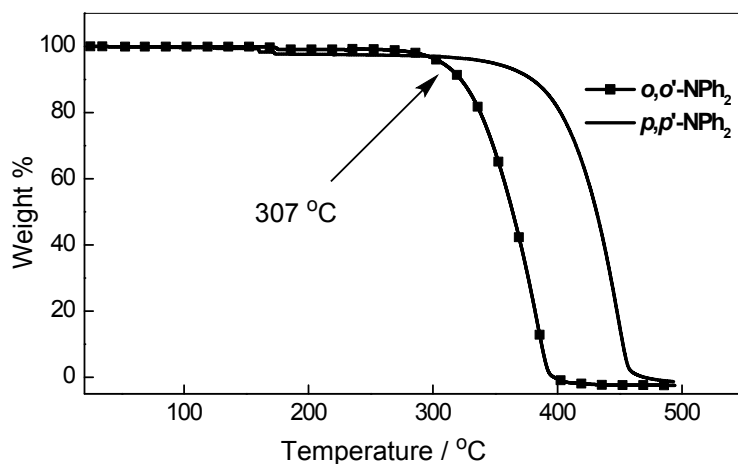

**Figure S4.** TGA analysis of *o,o'*-NPh<sub>2</sub>

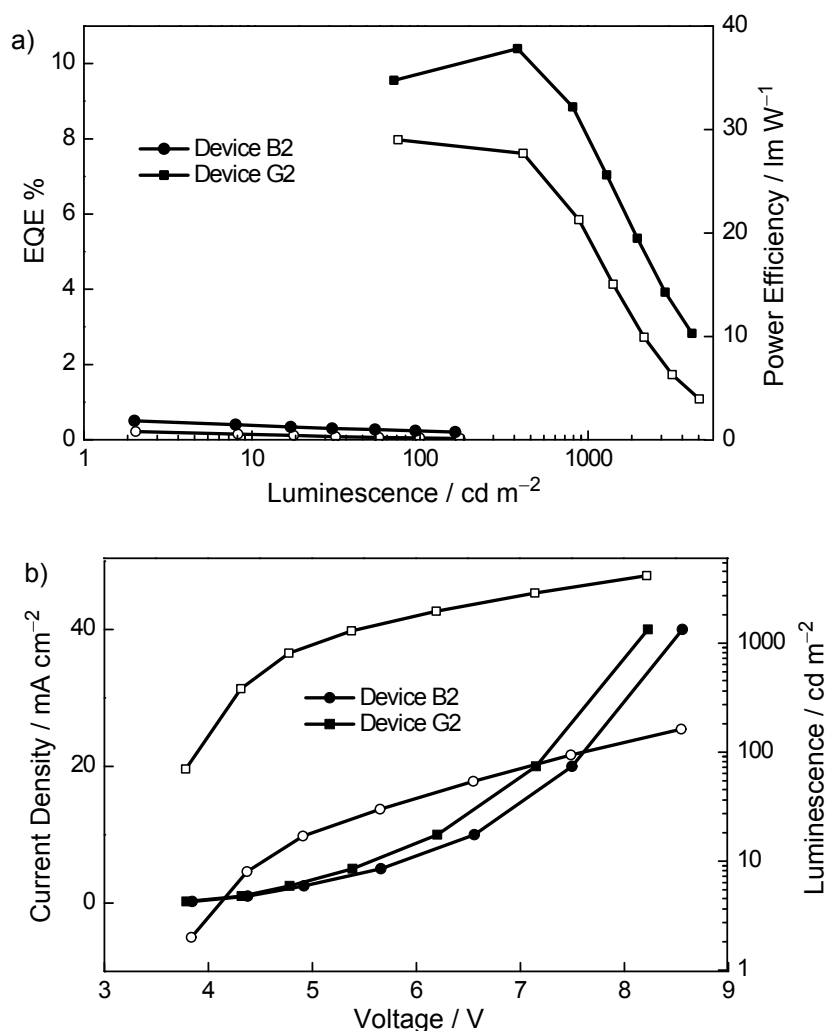

**Figure S5.** Performance of phosphorescent OLEDs using *p,p'*-NPh<sub>2</sub> as a host: a) Plots of EQE (solid) and power efficiency (hollow) as a function of luminescence; b) Plots of current density (solid) and luminescence (hollow) as a function of voltage.
